# Supplementary material
Source: Springer Nature journal article supplement (https://www.springermedizin.de/resource/supplementary/12933_2013_738_MOESM3_ESM.pdf/9538880)

11 mmol/L  
glucose

Infarct to area at risk ratio (I/R %)

70  
60  
50  
40  
30  
20  
10  
0

Control+  
vehicle

Control+  
Exendin

Control  
+H-89

Vilda+  
vehicle

Vilda+  
Exendin

Vilda  
+ H-89

\*

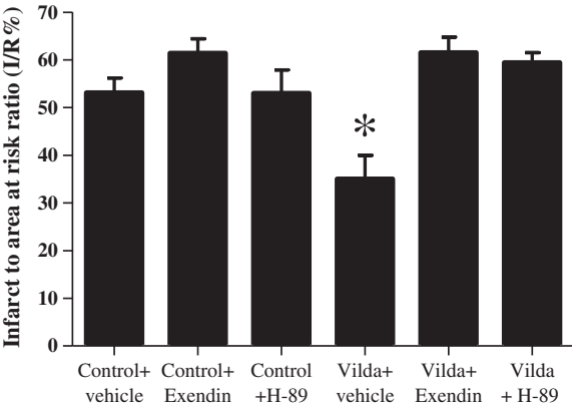

Supplement: MOESM3 [file 9538880]
